# Supplementary material for: Exosome release and neuropathology induced by α-synuclein: new insights into protective mechanisms of Drp1 inhibition
Source: PubMed Central journal article supplement (PMC6862865; doi:10.1186/s40478-019-0821-4), 2019-11-19
Supplement: 40478_2019_821_MOESM1_ESM.pdf [file 40478_2019_821_MOESM1_ESM.pdf]

## **Additional file 1**

### **Exosome release and neuropathology induced by $\alpha$ -synuclein: new insights into protective mechanisms of Drp1 inhibition.**

Rebecca Z. Fan<sup>1,2</sup>, Min Guo<sup>1,3</sup>, Shouqing Luo<sup>2</sup>, Mei Cui<sup>3,4</sup>, Kim Tieu<sup>1,4</sup>.

<sup>1</sup>Department of Environmental Health Sciences, Florida International University, Miami, USA

<sup>2</sup>Peninsula Schools of Medicine and Dentistry, Plymouth University, Plymouth, UK

<sup>3</sup>Department of Neurology, Huashan hospital, Fudan University, Shanghai, China

<sup>4</sup>To whom correspondence may be addressed: Kim Tieu (ktieu@fiu.edu, Phone: 305 348 0371, Fax: 305-348-1996) or Mei Cui (cuimei@fudan.edu.cn, Phone: 021-52888164, Fax: 62481088)

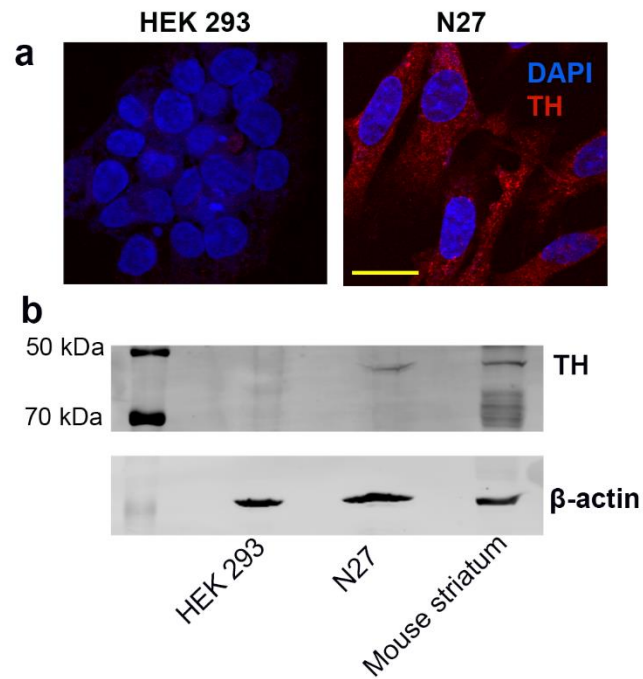

**Figure S1 Expression of tyrosine hydroxylase in N27 cells.** The expression of TH in N27 cells were assessed using immunocytochemistry (**a**) and immunoblotting (**b**). HEK 293 cells and mouse striatal tissues were used as a negative and positive control, respectively. Scale bar: 20  $\mu$ m.

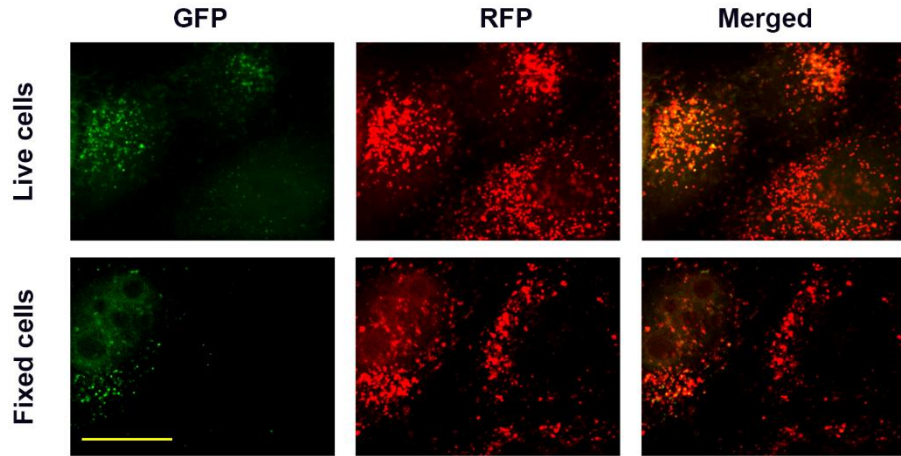

**Figure S2 Comparison of GFP signal in HeLa cells with or without PFA fixation.** For live cell imaging, HeLa cells were grown in Falcon® 8-well chamber slides and images were captured using Olympus FV10i Confocal Laser Scanning Microscope. For fixed cell imaging, HeLa cells were grown on borosilicate cover slips pre-coated with poly-D-lysine in 24-well plates. cells were fixed with 4% formaldehyde (Thermo Scientific™ Pierce™, #28906), in warm cell culture media at 37°C for 20 min and then images were captured using Olympus Fluoview 10i confocal microscope. Scale bar: 20  $\mu\text{m}$ ..

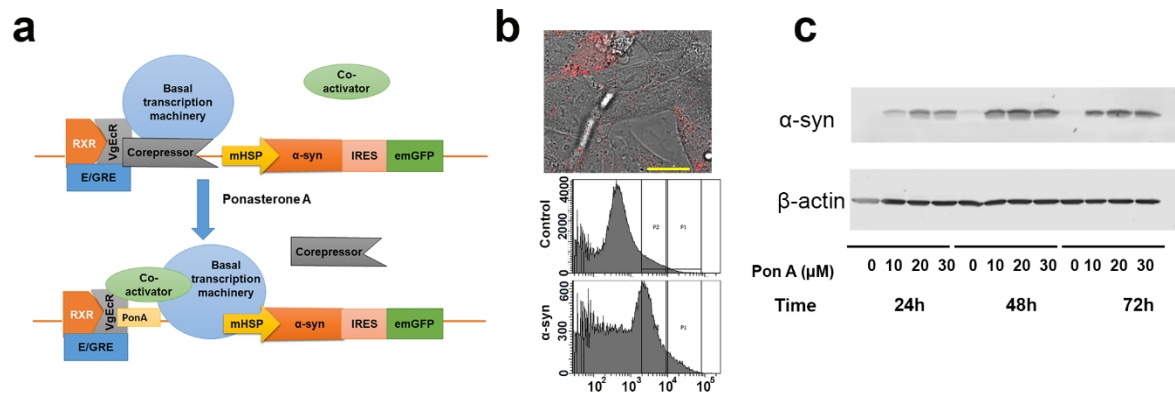

**Figure S3 Generation of inducible expression of human  $\alpha$ -synuclein in rat dopaminergic N27 neuronal cells.** **a.** Based on the technology that we previously described [15], cells were first transfected with a construct constitutively expressing the ecdysone receptor (VgEcR) and the retinoid X receptor (RXR). Once these stable cells were selected, they were transfected with a second vector containing the ecdysone-responsive element (E/GRE) and a multiple cloning site with insertion of SNCA which encodes human wild type  $\alpha$ -synuclein ( $\alpha$ -syn). In the presence of ponasterone A (ponA), an ecdysone analogue inducer, the corepressors are released from VgEcR and coactivators are recruited resulting in gene activation via the minimal heat shock promoter (mHSP). **b.** Cells were induced with PonA and treated with SMARTFlare Cy3-h $\alpha$ -syn mRNA probe overnight before analysis. Top panel: The uptake of this probe into cells was confirmed by confocal imaging combined with phase contrast. Bottom panel: FACS was used to select cells with  $\alpha$ -syn mRNA illustrated with the shift of Cy-3 signal in the group with PonA induction. The cell population (P1) with high  $\alpha$ -syn expression was collected and cultured for experiments. **c.** Dose-response (10, 20 and 30  $\mu$ M) and time-course (1-3 days) studies of PonA were performed to determine the optimal conditions for  $\alpha$ -syn expression. Western blot data show ponA induces  $\alpha$ -syn overexpression in a time- and dose-dependent manner.

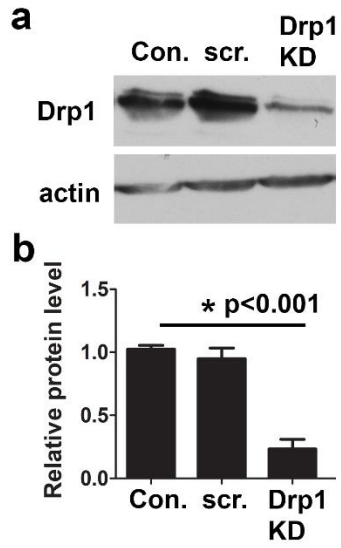

**Figure S4 Efficiency of *Drp1* siRNA.** **a.** N27 cells were transfected with siRNA-*Drp1* or non-targeting scramble control for 48h and then collected for immunoblotting. Representative images of *Drp1* levels and the loading control  $\beta$ -actin. **b.** *Drp1* levels were normalized to  $\beta$ -actin and quantified using ImageJ. Data represents mean  $\pm$  SEM, analyzed by one-way ANOVA, followed by Newman-Keuls post-hoc testing.  $n = 4$  independent experiments.

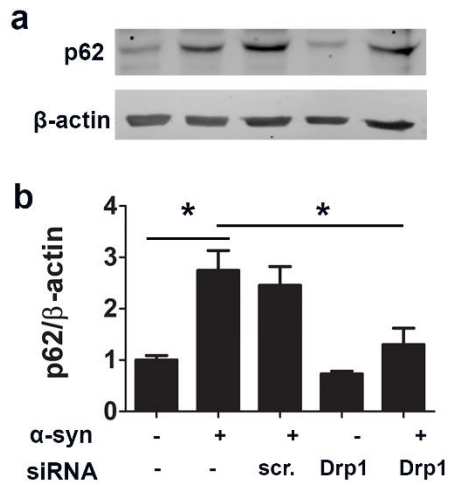

**Figure S5 Drp1 inhibition attenuates p62 accumulation in N27 neuronal cells with inducible  $\alpha$ -syn. a & b**  
 Stable N27 cells were transfected with siRNA-Drp1 or scramble control for 24h, then induced with PonA for an additional 48h, and processed for immunoblotting. p62 and  $\beta$ -actin (loading control) levels were quantified using Image J. Data represents mean  $\pm$  SEM, n = 3-4 independent experiments, analyzed by one-way ANOVA, followed by Newman-Keuls post hoc test. \*p < 0.05. \*p < 0.05

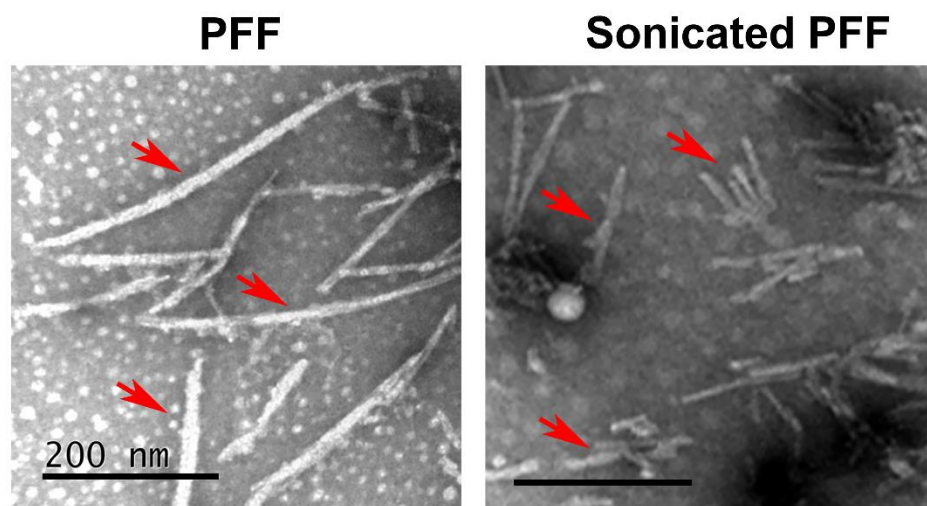

**Figure S6 Morphology of PFF.** Representative images of transmission electron micrographs (TEM) show morphology and size of  $\alpha$ -syn pre-formed fibrils (PFF) before (left panel) and after sonication (right panel) as indicated by arrows.

**Table 1.** Primary antibodies and dilutions used in western blot

| <b>Protein target</b>                | <b>Primary antibodies and dilutions</b>                                  | <b>Secondary antibodies and dilutions</b>                             |
|--------------------------------------|--------------------------------------------------------------------------|-----------------------------------------------------------------------|
| <b><math>\alpha</math>-synuclein</b> | BD Biosciences<br>#610787-Mouse monoclonal<br>1:1000                     | Bio-rad<br>#1706156-goat anti-mouse IgG HRP<br>conjugate<br>1:5,000   |
| <b>TH</b>                            | Novus Biologicals<br>#NB300-110, rabbit polyclonal<br>1:500              | Bio-rad<br>#1706515-goat anti-rabbit IgG HRP<br>conjugate<br>1:10,000 |
| <b>Drp1</b>                          | BD Biosciences<br>#611113-Mouse monoclonal<br>1:1000                     | Bio-rad<br>#1706156-goat anti-mouse IgG HRP<br>conjugate<br>1:10,000  |
| <b><math>\alpha</math>-synuclein</b> | EMD Millipore<br>#AB5038-Rabbit polyclonal<br>1:2000                     | Bio-rad<br>#1706515-goat anti-rabbit IgG HRP<br>conjugate<br>1:10,000 |
| <b>ALIX</b>                          | Abcam<br>#ab117600 Mouse monoclonal<br>[3A9]<br>1:1,000                  | Bio-rad<br>#1706156-goat anti-mouse IgG HRP<br>conjugate<br>1:10,000  |
| <b>TSG101</b>                        | Abcam<br>#ab125011- Rabbit monoclonal<br>[EPR7130(B)]<br>1:1,000         | Bio-rad<br>#1706515-goat anti-rabbit IgG HRP<br>conjugate<br>1:10,000 |
| <b>phospho4E-BP-1</b>                | Cell Signaling Technology<br>#2855 Rabbit monoclonal<br>(236B4)<br>1:500 | Bio-rad<br>#1706515-goat anti-rabbit IgG HRP<br>conjugate<br>1:5,000  |
| <b><math>\beta</math>-Actin</b>      | Millipore Sigma<br>#A5441-Mouse monoclonal<br>1:10,000                   | Bio-rad<br>#1706156-goat anti-mouse IgG HRP<br>conjugate<br>1:15,000  |



**Table 2.** Primary antibodies and dilutions used in immunostaining

| <b>Protein target</b> | <b>Primary antibodies and dilutions</b>                                        | <b>Secondary antibodies and dilutions</b>                                                                                       |
|-----------------------|--------------------------------------------------------------------------------|---------------------------------------------------------------------------------------------------------------------------------|
| <b>Drp1</b>           | BD Biosciences<br>#611113-Mouse monoclonal<br>1:500                            | Life Technologies<br>Alexa Fluor #A11031 or<br>#A21052-goat Goat anti-Mouse<br>IgG (H+L) Highly Cross-<br>Adsorbed<br>1:1,000   |
| <b>HA</b>             | Roche<br>#11 583 816 001-Mouse<br>monoclonal (12CA5)<br>1:300                  | Life Technologies,<br>Alexa Fluor #A11045-Goat anti-<br>Mouse IgG (H+L) Highly Cross-<br>Adsorbed<br>1:500                      |
| <b>p62</b>            | MBL International Corporation<br>#PM04-Rabbit polyclonal<br>(SQSTM1)<br>1: 500 | Life Technologies<br>Alexa Fluor #A21071-Goat anti-<br>Rabbit IgG (H+L) Highly Cross-<br>Adsorbed<br>1:1,000                    |
| <b>TH</b>             | Novus Biologicals<br>#NB300-110, rabbit polyclonal<br>1:1000                   | Life Technologies,<br>Alexa Fluor #A11011 Goat anti-<br>Rabbit IgG (H+L) Cross-<br>Adsorbed Secondary Antibody,<br>1:1000       |
| <b>α-synuclein</b>    | BD Biosciences<br>#610787-Mouse monoclonal<br>1:500                            | Life Technologies<br>Alexa Fluor-#A11029 or #A11031<br>or #A11045-Goat anti-Mouse IgG<br>(H+L) Highly Cross-Adsorbed<br>1:1,000 |
| <b>α-synuclein</b>    | EMD Millipore<br>#AB50380-Rabbit polyclonal<br>1: 2000                         | Life Technologies<br>Alexa Fluor #A11034-Goat anti-<br>Rabbit IgG (H+L) Highly Cross-<br>Adsorbed<br>1:1,000                    |
